# Supplementary material
Source: PubMed Central journal article supplement (PMC5547630)
Supplement: pnas.1704945114.sapp.pdf [file pnas.1704945114.sapp.pdf]

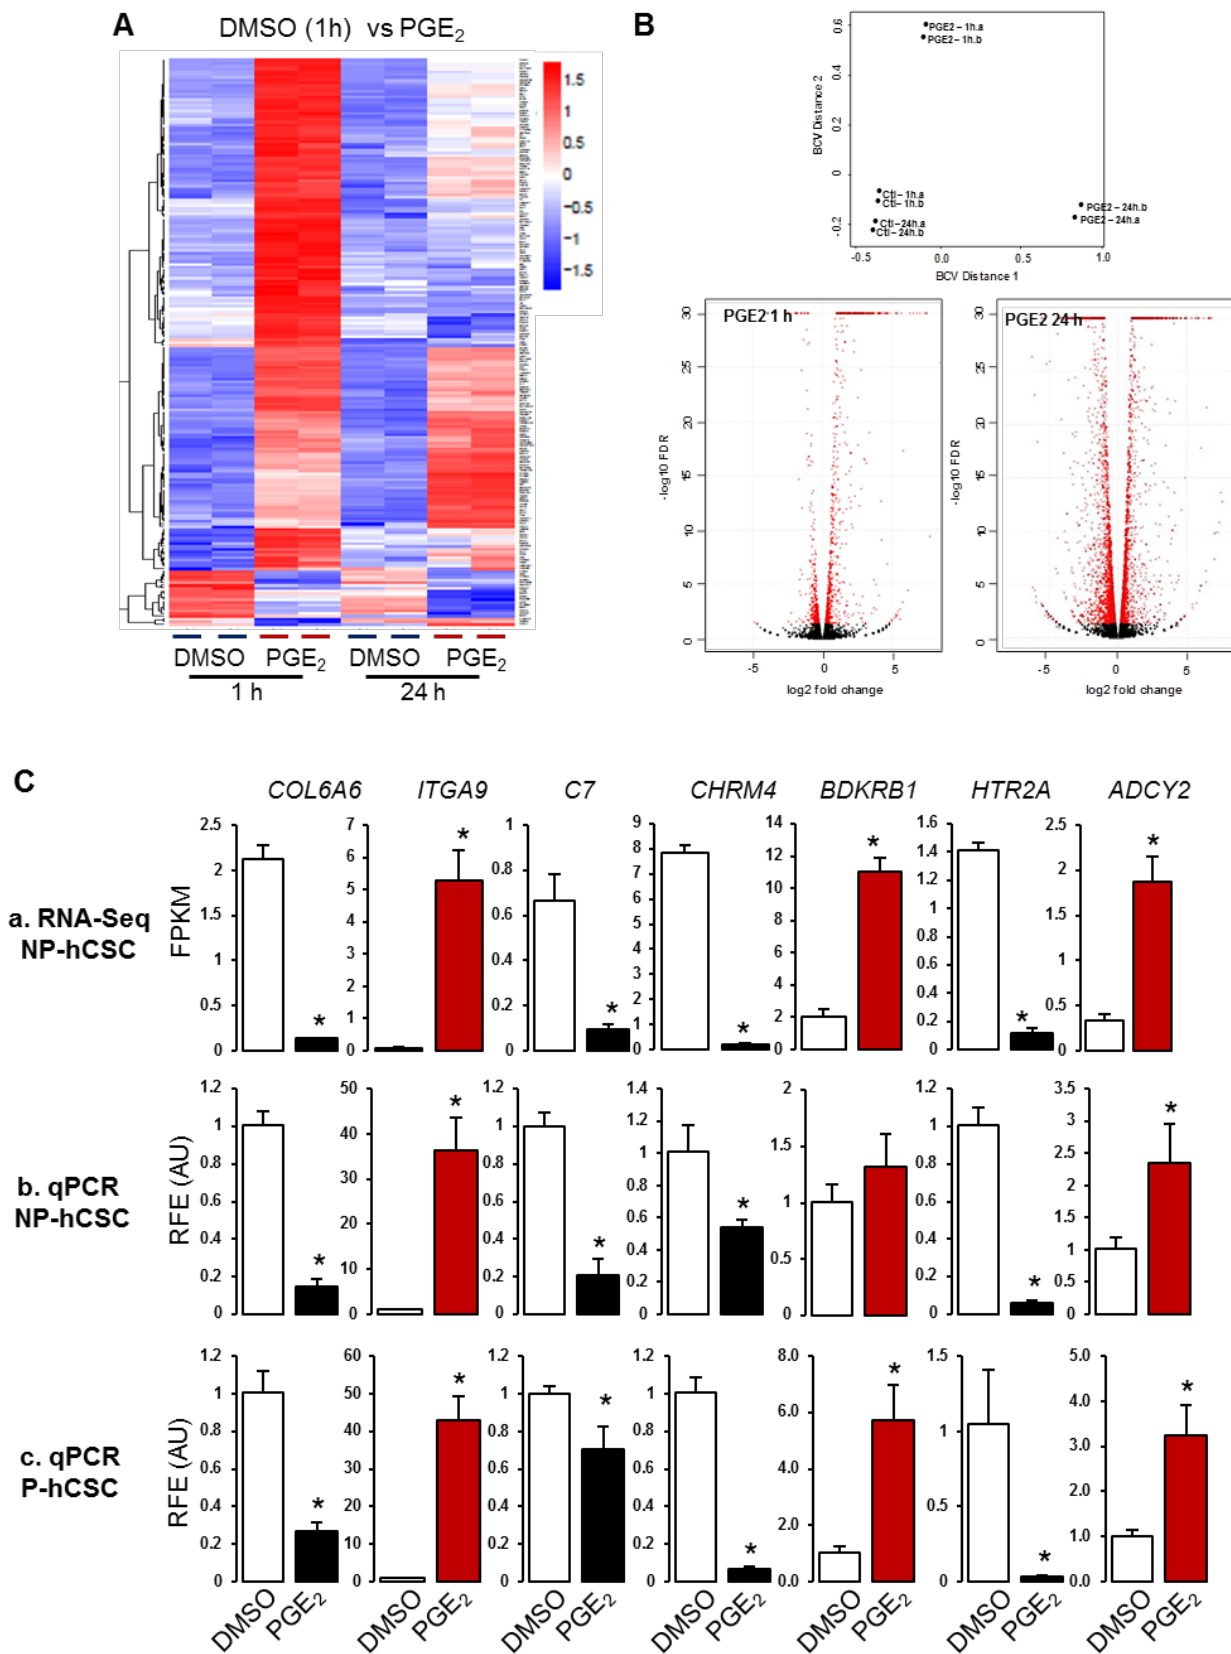

**Fig. S1. RNA-Seq data analysis and validation in human CSCs.** **A.** Heat map of data from cells treated with DMSO (0.1%) or PGE<sub>2</sub> (100 nM) for 1 or 24 h. Data represent hierarchical clustering of differentially expressed genes with False Discovery Rate (FDR) < 0.05, log<sub>2</sub> fold change > 1.5, normalized to 1 h DMSO. **B.** Principal component analysis demonstrating Biological Coefficient of Variation (BCV) of different treatment groups. Volcano plots providing FDR values and fold change for all gene transcripts in PGE<sub>2</sub>-treated hCSCs at 1 h (*Left*) or 24 h (*Right*). Differentially expressed genes with FDR < 0.05 are indicated in red. **C.** Validation of RNA-Seq data. Six different genes were selected by fold-change in different pathways significantly altered by PGE<sub>2</sub>. (a) Data from RNA-Seq analysis at 24 h expressed as Fragments Per Kilobase of exon per Million fragments mapped (FPKM). (b) Relative quantification of mRNA in hCSCs prepared from non-pregnant (**qPCR NP-hCSC**) or (c) pregnant (**qPCR P-hCSC**) cervixes treated with either DMSO or PGE<sub>2</sub> (100 nM) for 24 h. Data represent relative mean mRNA levels ± SD of triplicates normalized to GAPDH mRNA levels. \**P* < 0.05 compared with DMSO treated controls. RFE (AU), Relative Fold Expression (Arbitrary Units)

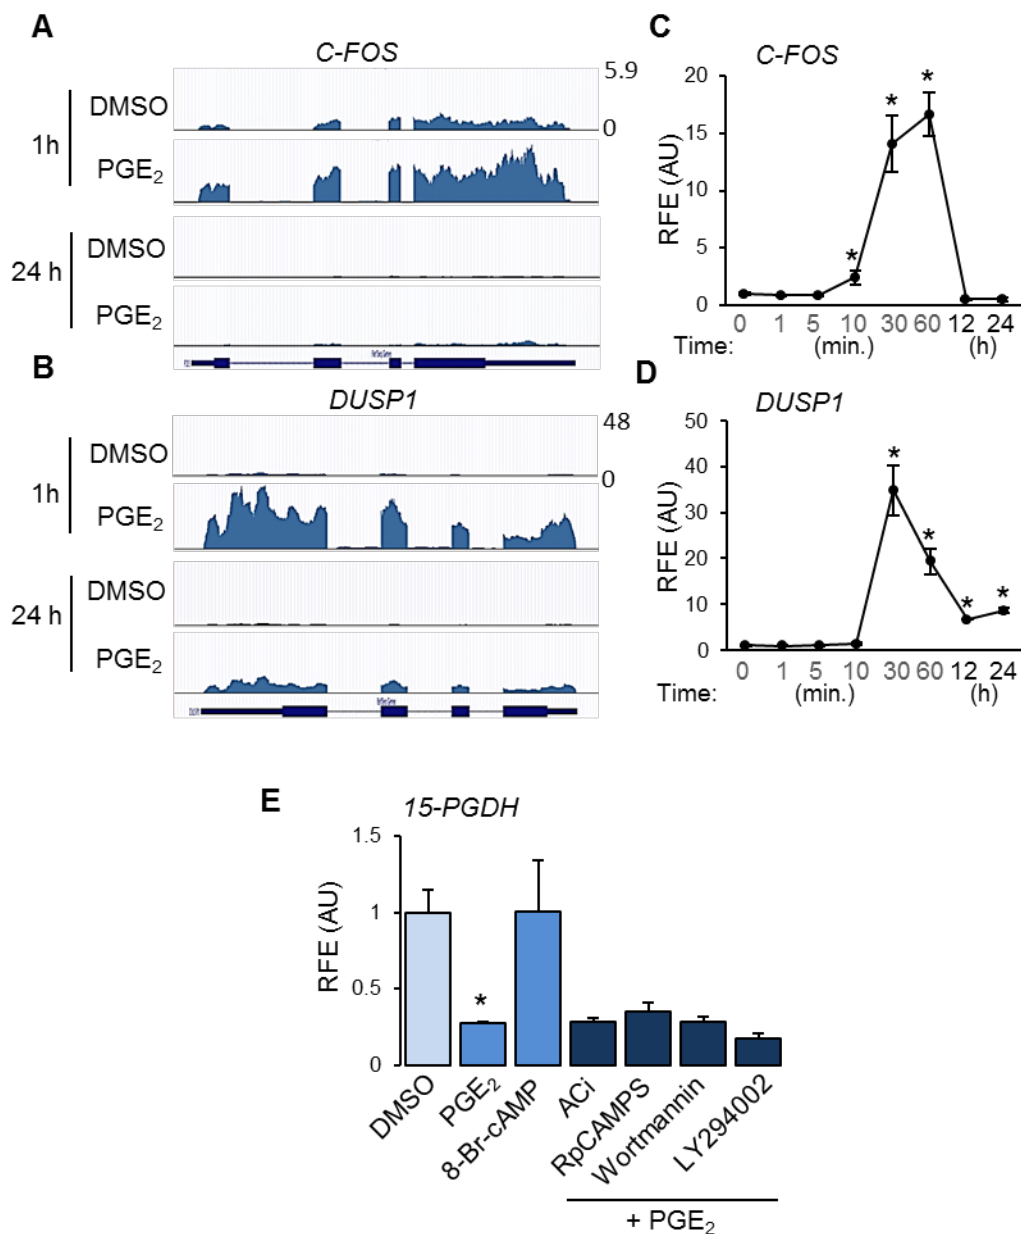

**Fig. S2. PGE<sub>2</sub>-mediated gene regulation is Ca<sup>2+</sup>-dependent.** Genomic browser snapshots of PGE<sub>2</sub>-mediated upregulation of *C-FOS* (A) and *DUSP1* (B) from RNA-seq dataset. C, D. Relative expression of Ca<sup>2+</sup>-responsive genes *C-FOS* and *DUSP1* in hCSCs treated with PGE<sub>2</sub> (100 nM) for different times quantified by RT-qPCR. Data represent relative mean mRNA levels  $\pm$  SD of triplicates after normalizing to GAPDH. \* $P < 0.01$  compared with 0 h time point. ANOVA, RFE (AU), Relative Fold Expression (Arbitrary Units). E. 15-PGDH mRNA levels in

hCSCs after treatment with DMSO, PGE<sub>2</sub> (50 nM) or 8-Bromo-cAMP (2 μM), PGE<sub>2</sub> + adenylate cyclase inhibitor (ACi, 10 μM) or PKA inhibitor (RpCAMPS 5 μM), or PI3K inhibitors Wortmannin (1 μM) or LY94002 (1 μM). Data represent relative mean mRNA levels ± SD of triplicates after normalizing to *GAPDH* repeated in 3 cell preps. \**P* < 0.01 compared to DMSO treated controls. Pathway inhibitors did not differ from PGE<sub>2</sub> alone, ANOVA followed by Tukey's test for multiple comparisons. RFE (AU), Relative Fold Expression (Arbitrary Units)

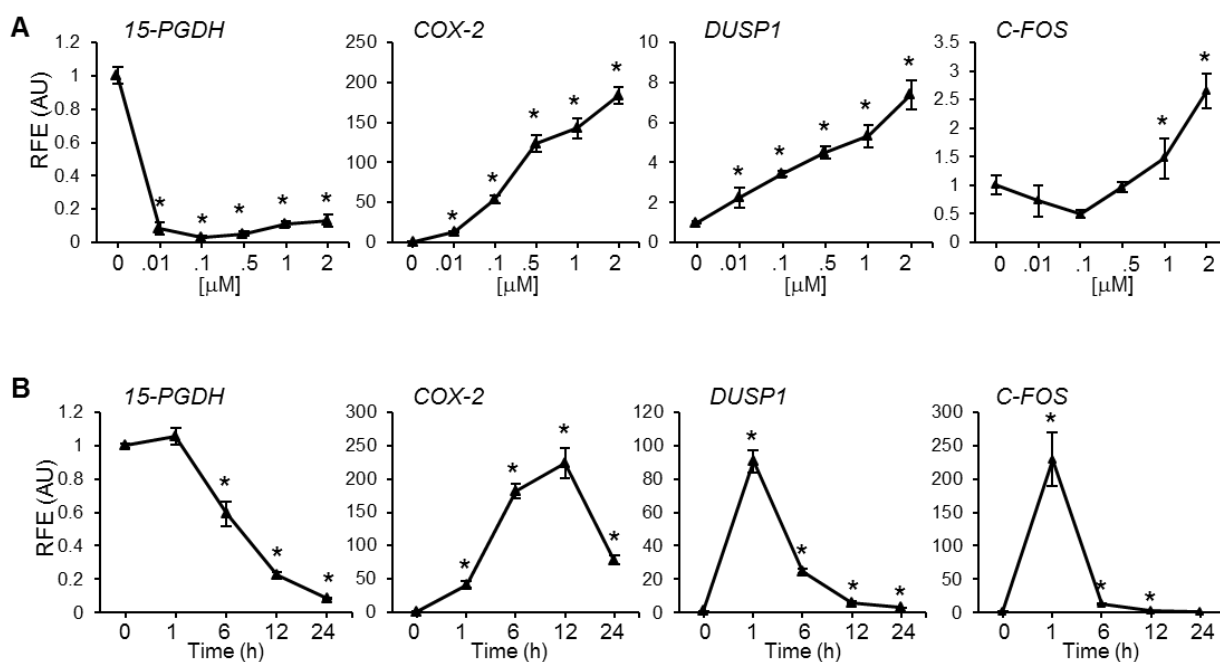

**Fig. S3. Calcium ionophore A23187 mimics PGE<sub>2</sub> mediated effects in hCSCs.** Relative levels of *15-PGDH*, *COX-2*, *DUSP1* and *C-FOS* mRNA in hCSCs treated with (A) increasing concentrations of the Ca<sup>2+</sup> ionophore A23187 for 24 h, or (B) A23187 (1 μM) as a function of time. Data represent relative mean mRNA levels ± SD of triplicates after normalizing to *GAPDH* mRNA. \**P* < 0.01 compared with 0 h time point. RFE (AU), Relative Fold Expression (Arbitrary Units).

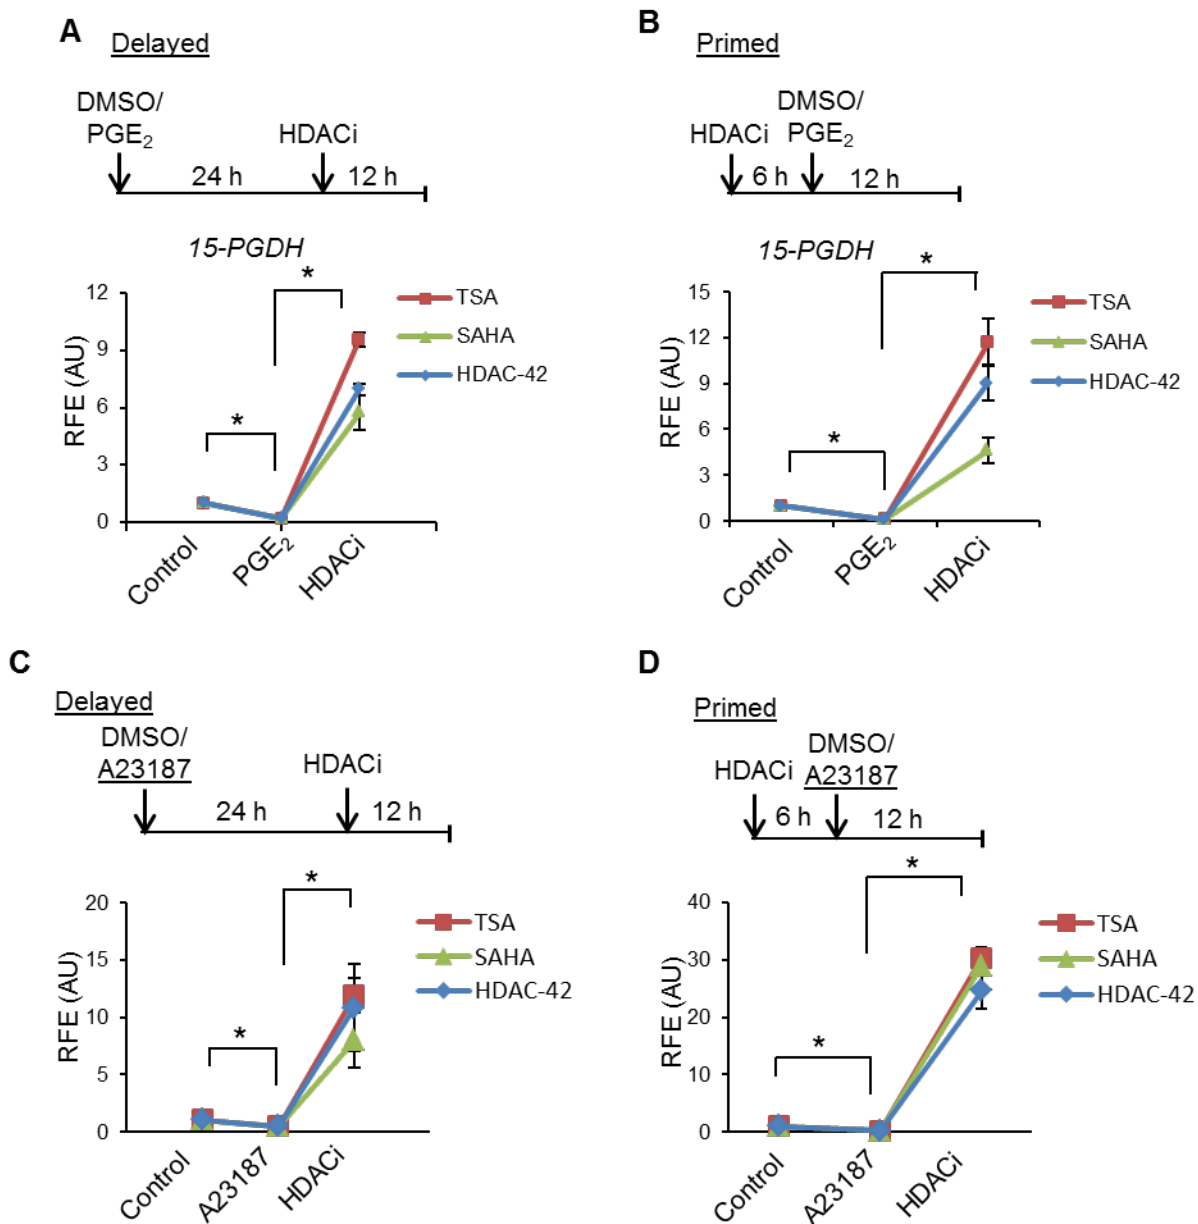

**Fig. S4. HDACi treatment blocks PGE<sub>2</sub>-mediated 15-PGDH gene repression both before and after PGE<sub>2</sub> treatment.** 15-PGDH mRNA levels in hCSCs treated with DMSO or PGE<sub>2</sub> (A, 100 nM) or A23187 (C, 1 μM) for 24 h followed by treatment with HDACi [TSA (1 μM)/SAHA (2.5 μM)/HDAC-42 (1 μM)] for 12 h (**delayed** treatment), or with DMSO or HDACi [TSA (1 μM)/SAHA (2.5 μM)/HDAC-42 (1 μM)] for 6 h followed by treatment with PGE<sub>2</sub> (B, 100 nM) or A23187 (D, 1 μM) for 12 h (**primed** treatment). Data represent relative mean mRNA levels ±

SD of triplicates after normalizing to GAPDH mRNA levels. \* $P < 0.05$  ANOVA, RFE (AU), Relative Fold Expression (Arbitrary Units)

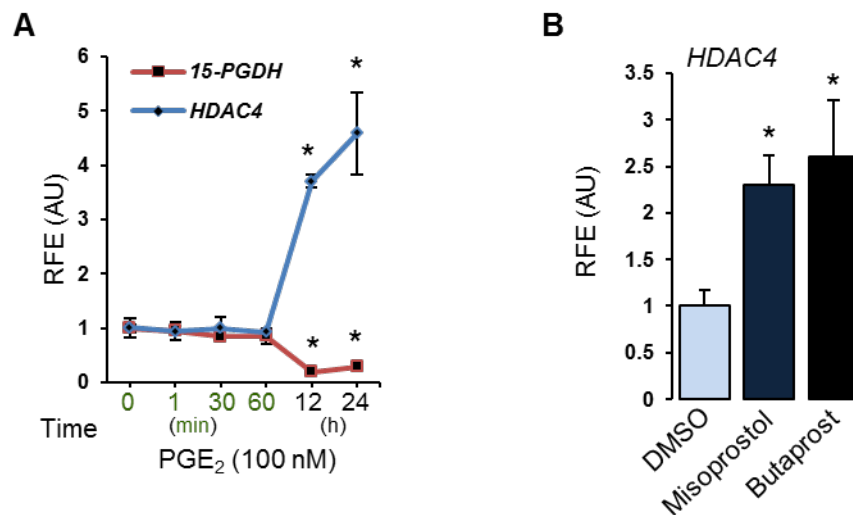

**Fig. S5. Reciprocal regulation of 15-PGDH and HDAC4 by PGE<sub>2</sub>.** **A.** HDAC4 and 15-PGDH mRNA after treatment with PGE<sub>2</sub> (100 nM) as a function of time in minutes or hours as indicated. **B.** Misoprostol (100 nM) and butaprost (100 nM, EP2-selective agonist) increase HDAC4 mRNA (24h). Data represent relative mean mRNA levels  $\pm$  SD of triplicates after normalizing to GAPDH mRNA levels in at least 3 cell preps. \* $P < 0.05$  ANOVA, RFE (AU), Relative Fold Expression (Arbitrary Units)

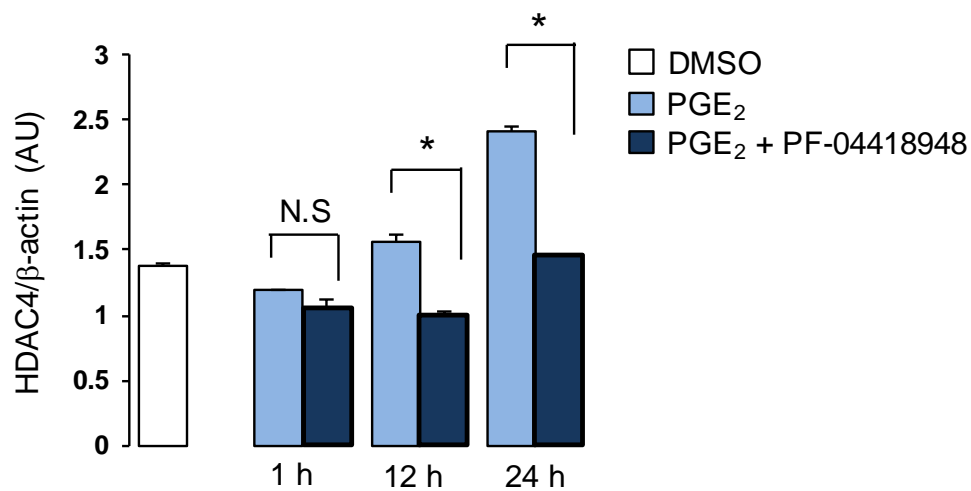

**Fig. S6. PGE<sub>2</sub> increases HDAC4 levels via EP2 receptor.** Densitometric quantitation of immunoblots of HDAC4 protein in hCSCs pretreated with DMSO or PF-04418948 (2 μM) followed by DMSO or PGE<sub>2</sub>. \* $P < 0.05$  compared with PGE<sub>2</sub> treatment alone, Student's  $t$  test. N

= 3

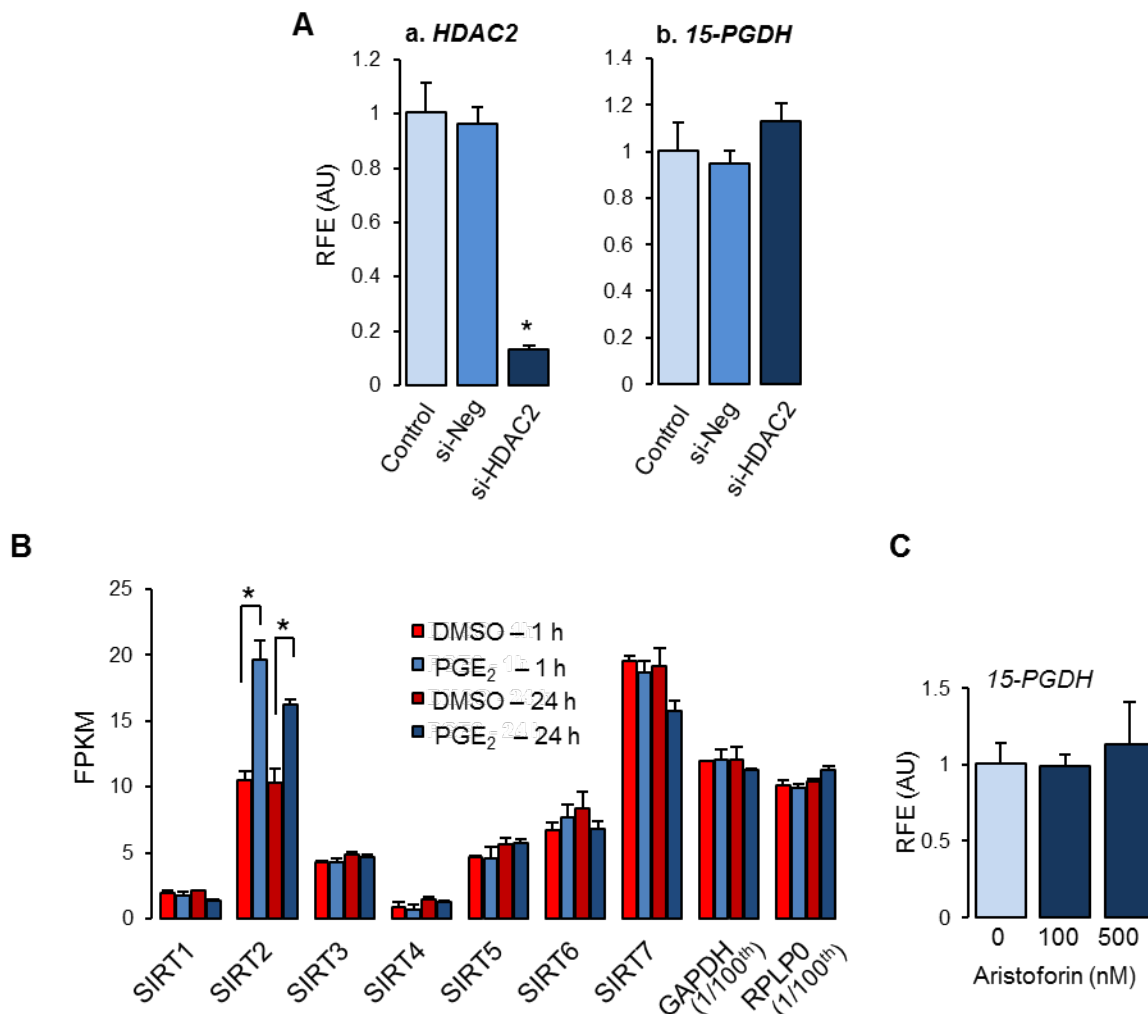

**Fig. S7. HDAC2 and Sirtuins (Class III HDACs) do not regulate 15-PGDH gene in hCSCs.**

**A.** mRNA levels of *HDAC2* and *15-PGDH* in hCSCs transfected with negative siRNA control or *HDAC2*-specific siRNA. **B.** Data represents Fragments Per Kilobase of exon per Million fragments mapped (FPKM) of sirtuins expressed in hCSCs treated with DMSO or PGE<sub>2</sub> (100 nM) for 1 or 24 h mined from RNA-Seq dataset. GAPDH and RPLP0 are shown as controls (1/100<sup>th</sup> FPKM values). \**P* < 0.05 compared with corresponding DMSO control. **C.** *15-PGDH* mRNA levels in hCSCs treated with indicated concentrations of sirtuin inhibitor Aristoforin for



24 h. Data represent relative mean mRNA levels  $\pm$  SD of triplicates after normalizing to GAPDH mRNA levels in at least 3 cell preps. Relative Fold Expression (Arbitrary Units)

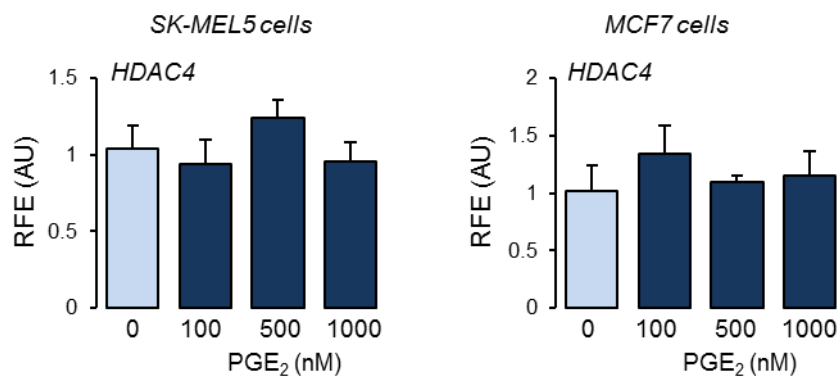

**Fig. S8. PGE<sub>2</sub> does not alter HDAC4 gene expression in SK-MEL5 and MCF7 cells.** HDAC4 mRNA levels quantified by RT-qPCR in SK-MEL5 melanoma cells or MCF7 breast cancer cells treated with increasing concentrations of PGE<sub>2</sub> as indicated for 24 h. Data represent relative mean mRNA levels  $\pm$  SD of triplicates after normalizing to GAPDH mRNA levels. RFE(AU), Relative Fold Expression (Arbitrary Units)

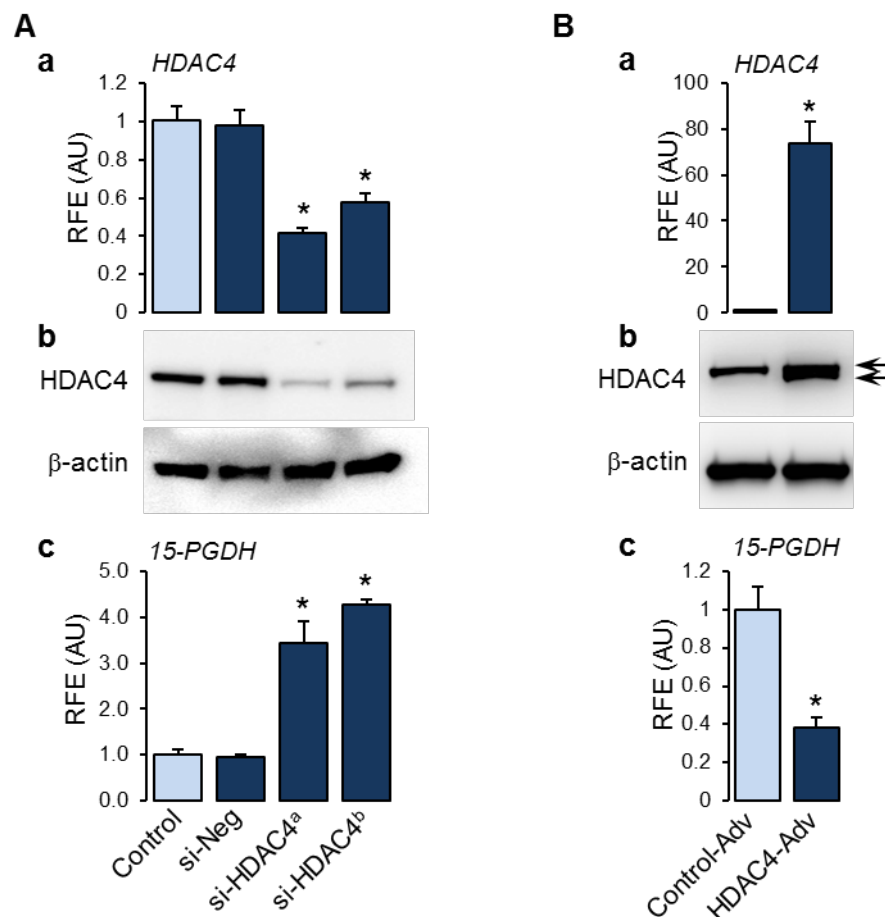

**Fig. S9. 15-PGDH is an HDAC4 target gene in hCSCs.** **A.** mRNA levels of HDAC4 (**Aa**) and 15-PGDH (**Ac**) and protein levels of HDAC4 (**Ab**) in hCSCs transfected with control negative siRNA or two different HDAC4 siRNAs (<sup>a</sup>Ambion; <sup>b</sup>Santa Cruz Biotechnologies) for 56 h. \* $P < 0.001$  compared to si-Neg. Student's  $t$  test.  $N = 3$ . **B.** mRNA levels of HDAC4 (**Ba**) and 15-PGDH (**Bc**) and protein levels of HDAC4 (**Bb**) in hCSCs infected with control adenovirus or HDAC4-expressing adenovirus for 48 h followed by incubation in serum-free medium for 24 h. Arrows indicate two immunoreactive proteins \* $P < 0.001$  compared with control adenovirus infected cells. Student's  $t$  test. RFE (AU), Relative Fold Expression (Arbitrary Units)

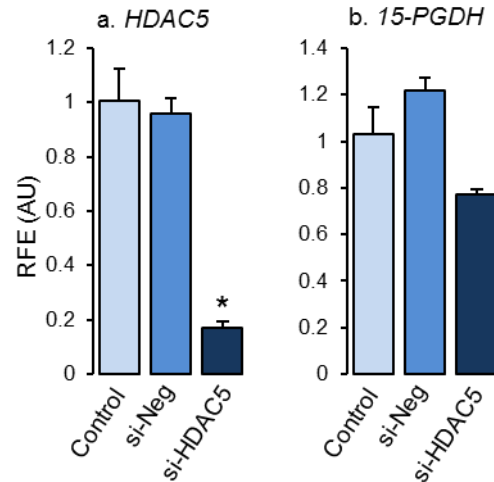

**Fig. S10. HDAC5 does not regulate *15-PGDH* gene expression in hCSCs.** mRNA levels of HDAC5 and 15-PGDH in hCSCs transfected with negative siRNA control or HDAC5 specific siRNA. Data represent relative mean mRNA levels  $\pm$  SD of triplicates after normalizing to GAPDH mRNA levels. \* $P = 0.00002$  compared with siNeg transfected cells. ANOVA, RFE(AU), Relative Fold Expression (Arbitrary Units)

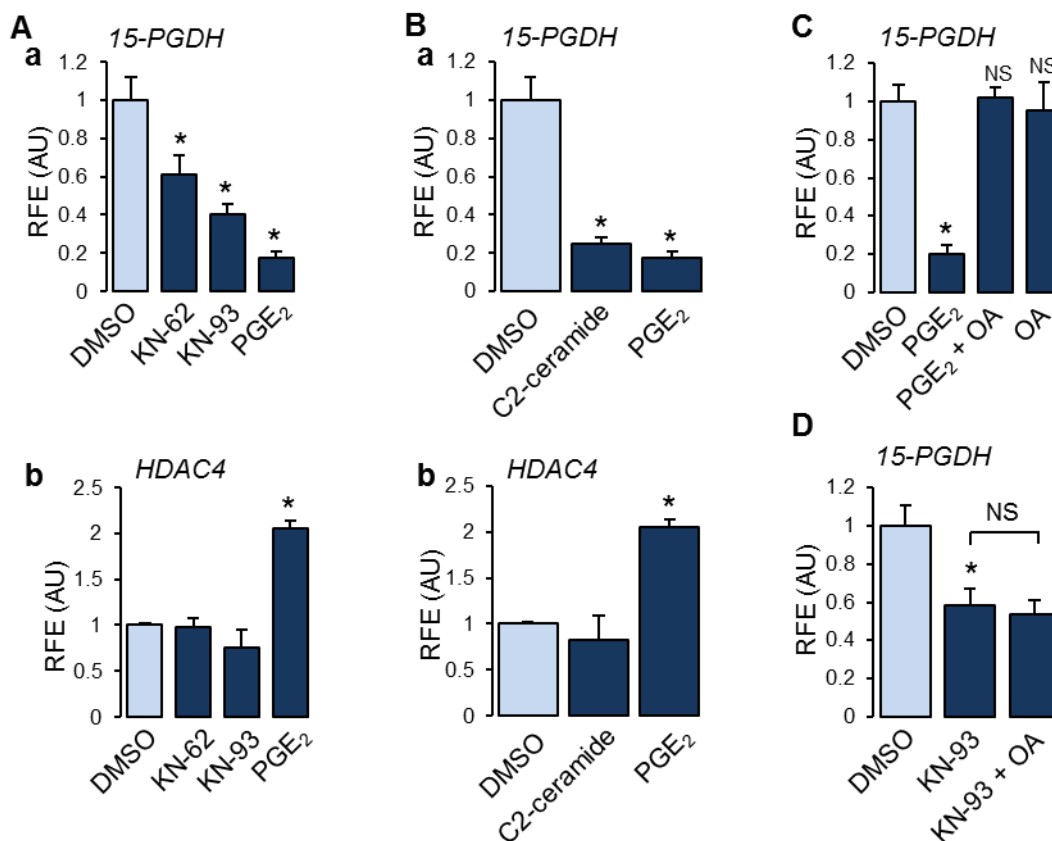

**Fig. S11. HDAC4 mediated repression of 15-PGDH is de-phosphorylation dependent. A.**

Relative mRNA levels of 15-PGDH (**a**) and HDAC4 (**b**) in hCSCs treated with DMSO, KN-62 (5  $\mu$ M), KN-93 (5  $\mu$ M), or PGE<sub>2</sub> (100 nM) for 24 h. **B.** Levels of 15-PGDH (**a**) and HDAC4 (**b**) mRNA in hCSCs treated with DMSO, C2 ceramide (50  $\mu$ M) or PGE<sub>2</sub> (100 nM) for 24 h. **C, D.** 15-PGDH mRNA levels in hCSCs pretreated with DMSO or okadaic acid (OA, 100 nM) for 1 h followed by treatment with DMSO or KN-93 (5  $\mu$ M) for 23 h. Data represent mean mRNA levels  $\pm$  SD of triplicates after normalizing to GAPDH mRNA levels. \* $P < 0.01$  compared with DMSO treatment. Student's  $t$  test.  $N = 3$  in at least 3 cell preps. RFE (AU), Relative Fold Expression (Arbitrary Units). **OA**, okadaic acid

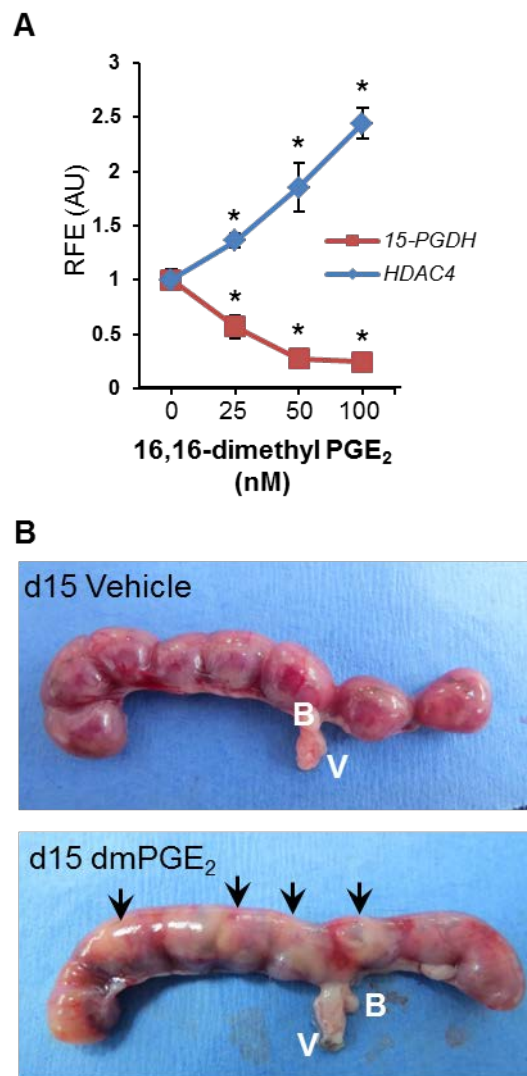

**Fig. S12. 16,16-dimethyl PGE<sub>2</sub> induces HDAC4 and represses 15-PGDH gene expression and has adverse fetal effects in pregnant mice. A.** HDAC4 and 15-PGDH mRNA levels in hCSCs treated with increasing concentrations of 16,16-dimethyl PGE<sub>2</sub> as indicated for 24 h. \* $P < 0.01$  compared with DMSO treatment. ANOVA followed by Dunnett's with time 0 as control,  $n = 3$ . **B.** Female reproductive tract dissected on d15, 6 h after treatment for assessment of health of pups and gross morphological changes in cervix and uterus. Arrow indicates pale ischemic pups; **V**, vagina; **B**, bladder

**Supplementary Table 1. Clinical characteristics of pregnant women from who samples were obtained for analysis.**

|                                                        | <b>Early Gestation<br/>Nonripe cervix<br/>n = 4</b>                                                                                                                            | <b>Not in labor<br/>Nonripe cervix<br/>n = 7</b>                                                                  | <b>Not in labor<br/>Ripe cervix<br/>n = 8</b>                                                              | <b>Labor<br/>Dilated cervix<br/>n = 8</b>                                                                                                                                                            |
|--------------------------------------------------------|--------------------------------------------------------------------------------------------------------------------------------------------------------------------------------|-------------------------------------------------------------------------------------------------------------------|------------------------------------------------------------------------------------------------------------|------------------------------------------------------------------------------------------------------------------------------------------------------------------------------------------------------|
| <b>Gestational age<br/>(mean <math>\pm</math> SEM)</b> | 13 $\pm$ 0.8                                                                                                                                                                   | 35 $\pm$ 1.3                                                                                                      | 37.4 $\pm$ 0.82                                                                                            | 38.9 $\pm$ 0.6                                                                                                                                                                                       |
| <b>Parity, median<br/>[range]</b>                      | 3 [1,4]                                                                                                                                                                        | 2 [1-3]                                                                                                           | 2 [1,5]                                                                                                    | 3 [1-4]                                                                                                                                                                                              |
| <b>Bishop score<br/>Median [range]</b>                 | 2 [1,2]                                                                                                                                                                        | 3 [2,4]                                                                                                           | 6.5 [5-8]                                                                                                  | 8 [7,10]                                                                                                                                                                                             |
| <b>Surgical<br/>indications</b>                        | 1 fetal demise,<br>failed attempt at<br>dilation<br>1 molar<br>pregnancy<br>desiring<br>hysterectomy<br>2 repeat C/S;<br>fetal demise;<br>placenta<br>invading uterine<br>scar | 5 repeat C/S;<br>placenta<br>previa/accreta<br>1 primary C/S<br>placenta previa<br>1 repeat C/S;<br>uterine atony | 4 repeat C/S;<br>placenta<br>previa/accreta<br>1 term molar<br>pregnancy<br>3 repeat C/S;<br>uterine atony | 2 placenta<br>percreta<br>2 fetal distress;<br>uterine<br>hemorrhage<br>1 failure to<br>progress;<br>hemorrhage<br>1 repeat C/S<br>leiomyomas<br>1 abruptio<br>placentae<br>1 primary C/S<br>breech; |

**Supplementary Table 2: Sequences and Catalog numbers for primers used in RT-qPCR**

| S. No. | Gene                | Sequence/Catalog #                                                                |
|--------|---------------------|-----------------------------------------------------------------------------------|
| 1      | COL6A6 <sup>a</sup> | Hs01029204_m1                                                                     |
| 2      | ITGA9 <sup>a</sup>  | Hs00979865_m1                                                                     |
| 3      | C7 <sup>a</sup>     | Hs00940408_m1                                                                     |
| 4      | CHRM4 <sup>a</sup>  | Hs00265219_s1                                                                     |
| 5      | BDKRB1 <sup>a</sup> | Hs00664201_s1                                                                     |
| 6      | HTR2A <sup>a</sup>  | Hs01033524_m1                                                                     |
| 7      | ADCY2 <sup>a</sup>  | Hs01058848_m1                                                                     |
| 8      | 15-PGDH             | 5'GCCGGTTTATTGTGCTTCAA3' &<br>5' TCTCACACCACTGTTTCATAAGATTAG 3'                   |
| 9      | PTGES <sup>a</sup>  | Hs01115610_m1                                                                     |
| 10     | COX-2               | GAATCATTACCAGGCAAATT &<br>TCTGTACTGCGGGTGGAAACA<br>Probe FAMTCCTACCACCAGCAACCCTGC |
| 11     | DUSP1 <sup>a</sup>  | Hs00610256_g1                                                                     |
| 12     | C-FOS <sup>b</sup>  | QHsaCED0046695                                                                    |
| 13     | HDAC4 <sup>a</sup>  | Hs01041638_m1                                                                     |
| 14     | HDAC5 <sup>a</sup>  | Hs00608366_m1                                                                     |
| 15     | HDAC2 <sup>a</sup>  | Hs00231032_m1                                                                     |
| 16     | GAPDH               | 5'GGAGTCAACGGATTTGGTCGTA3' &<br>5'CAACAATATCCACTTTACCAGAGTTA3'                    |

<sup>a</sup>ThermoFisher Scientific; <sup>b</sup>BIO-RAD
